# An Investigation of Genome-Wide Studies Reported Susceptibility Loci for Ulcerative Colitis Shows Limited Replication in North Indians

Garima Juyal<sup>1</sup>, Pushplata Prasad<sup>1</sup>, Sabyasachi Senapati<sup>1</sup>, Vandana Midha<sup>2</sup>, Ajit Sood<sup>2</sup>, Devendra Amre<sup>3,4</sup>, Ramesh C. Juyal<sup>5</sup>, Thelma BK<sup>1\*</sup>

**1** Department of Genetics, University of Delhi, South Campus, New Delhi, India, **2** Dayanand Medical College and Hospital, Ludhiana, Punjab, India, **3** Department of Pediatrics, University of Montreal, Montreal, Canada, **4** Research Center, Sainte-Justine Hospital, Montreal, Canada, **5** National Institute of Immunology, New Delhi, India

## Abstract

Genome-Wide Association studies (GWAS) of both Crohn's Disease (CD) and Ulcerative Colitis (UC) have unearthed over 40 risk conferring variants. Recently, a meta-analysis on UC revealed several loci, most of which were either previously associated with UC or CD susceptibility in populations of European origin. In this study, we attempted to replicate these findings in an ethnically distinct north Indian UC cohort. 648 UC cases and 850 controls were genotyped using Infinium Human 660W-quad. Out of 59 meta-analysis index SNPs, six were not in the SNP array used in the study. Of the remaining 53 SNPs, four were found monomorphic. Association ( $p < 0.05$ ) at 25 SNPs was observed, of which 15 were CD specific. Only five SNPs namely rs2395185 (*HLA-DRA*), rs3024505 (*IL10*), rs6426833 (*RNF186*), rs3763313 (*BTNL2*) and rs2066843 (*NOD2*) retained significance after Bonferroni correction. These results (i) reveal limited replication of Caucasian based meta-analysis results; (ii) reiterate overlapping molecular mechanism(s) in UC and CD; (iii) indicate differences in genetic architecture between populations; and (iv) suggest that resources such as HapMap need to be extended to cover diverse ethnic populations. They also suggest a systematic GWAS in this terrain may be insightful for identifying population specific IBD risk conferring loci and thus enable cross-ethnicity fine mapping of disease loci.

**Citation:** Juyal G, Prasad P, Senapati S, Midha V, Sood A, et al. (2011) An Investigation of Genome-Wide Studies Reported Susceptibility Loci for Ulcerative Colitis Shows Limited Replication in North Indians. PLoS ONE 6(1): e16565. doi:10.1371/journal.pone.0016565

**Editor:** Amanda Toland, Ohio State University Medical Center, United States of America

**Received:** August 19, 2010; **Accepted:** January 5, 2011; **Published:** January 31, 2011

**Copyright:** © 2011 Juyal et al. This is an open-access article distributed under the terms of the Creative Commons Attribution License, which permits unrestricted use, distribution, and reproduction in any medium, provided the original author and source are credited.

**Funding:** Research grant # BT/01/COE/07/UDSC from Dept. of Biotechnology, New Delhi, India is gratefully acknowledged. The funders had no role in study design, data collection and analysis, decision to publish, or preparation of the manuscript.

**Competing Interests:** The authors have declared that no competing interests exist.

\* E-mail: thelmabk@gmail.com

## Introduction

Ulcerative colitis (UC) and Crohn's disease (CD), the two sub-phenotypes of inflammatory bowel diseases (IBDs), are polygenic conditions that are suspected to result from dysregulated activation of immune mechanism to commensal microbes in genetically predisposed individuals. Considered to be a disease of the developed populations, there is growing evidence that the incidence of the disease may be high in developing countries as well. This is more so for ethnically heterogeneous populations such as the north Indian population, where we have recently shown that the incidence of disease in particular for UC is comparable to that reported in Western countries [1].

It is well established that genetic factors contribute to susceptibility for both CD and UC. Recently Genome wide association studies (GWAS) together with meta-analysis of GWAS findings involving UC [2–7] and CD [8–12] unearthed several risk conferring loci. Although some loci showed specific association with CD (*ATG16L1*) [10] or UC (*IL10*, *ECM1*, *HERC2*) [13], a substantial overlap in genetic risk factors between the phenotypes have also been observed with genes such as *IL23R* at the forefront [6,14–15]. Discovery of these susceptibility genes, common as well as unique, has provided valuable insights into the link between the innate and adaptive immunity vis-à-vis risk for IBD.

Most candidate gene studies and recent GWAS have confirmed absence of associations with susceptibility variants in *NOD2* gene and UC in Caucasians. However, we have previously reported notable allelic heterogeneity in this gene in a UC cohort from north India wherein the three frequently CD associated variants namely rs2066844, rs2066845 and rs2066847 were either absent or rarely present. Upon re-sequencing the gene in control subjects, only two reported polymorphisms, rs2066842 (Pro268Ser) and rs2067085 (Ser178Ser) were found. Of these, Pro268Ser that is common in Caucasians but associated with CD only in the presence of SNP13 was significantly associated with UC in our cohort. Analyzing the tag SNP profile for *NOD2* locus in this population revealed that the LD structure around Pro268Ser in the north Indians differs from that among Caucasians. These novel findings suggest population specific genetic profiles for UC in the north Indian population [16] warranting replication of other promising candidate genes.

With this background, we investigated whether the UC/CD genes/loci reported in the recent meta-analyses [6] were associated with UC in the ethnically distinct north Indian population.

## Results

Six of the 59 meta-analysis index SNPs were not present in the Infinium Human 660W-quad array used in this study (Table 1).

Of the remaining 53 tested, four SNPs namely rs11465804 and rs11209026 (*IL23R*); rs2476601 (*PTPN22*) and rs4613763 (*LOC730002*) were monomorphic and therefore additional SNPs from these genes/loci were tested. Barring *IL23R*, both *PTPN22* and *LOC730002* were not significant ( $p > 0.05$ ) in our cohort. The associated *IL23R* SNPs are shown in Table 2.

Of the remaining 49 index SNPs, associations were replicated with 25 SNPs ( $p < 0.05$ ) with 15 of them previously identified as CD specific (including rs2188962 located in IBD5 locus) (Table 1). Among these, five SNPs namely rs6426833 (*RNF186*,  $p = 0.0004$ ), rs3024505 (*IL10*,  $p = 0.001$ ), rs3763313 (*BTNL2*,  $p = 2.415 \times 10^{-5}$ ), rs2395185 (*HLA-DRA*,  $p = 2.038 \times 10^{-6}$ ) and rs2066843 (*NOD2*,  $p = 0.0002$ ) withstood Bonferroni correction (Table 1, Fig. 1). It is noteworthy to mention here that we previously reported association of Pro268Ser in *NOD2*, a famous CD specific gene, [16] which is in complete LD ( $r^2 = 1$ ) with aforementioned SNP rs2066843.

While loci harbouring *ITLN1* and *CCL2*, both reported as CD specific genes showed borderline significance  $p = 0.07$  and  $0.06$  respectively, other notable functional genes/ loci such as *CARD9*, *IL26*, *IL12B*, *CEP72*, *PUS10*, *FCGR2A*, *KIF21B*, *CDKAL1* and *MAP3K7IP2* otherwise replicated in Caucasians were not significantly associated with UC in north Indians (Table 1). Interestingly, another promising CD associated candidate, *ATG16LI*, also showed modest association ( $p = 0.05$ ) in our sample. With about 650 cases/850 controls and after accounting for 49 comparisons (alpha set at 0.001), the study had sufficient power (80% using QUANTO <http://hydra.usc.edu>) to detect associations with odds ratios 1.3 or higher (or 0.77 or lower) for allele frequencies between 20%~30%, odds ratios 1.4 or higher (0.71 or lower) for allele frequencies between 10%~20% & odds ratios 1.6 or higher for allele frequencies of 5~10% assuming a log-additive model of inheritance.

## Discussion

Recent GWAS have identified >30 susceptibility genes/loci that predispose populations of European origin to IBD. The credibility and relevance of these genetic association studies is indicated by the success of replication attempts in diverse ethnic groups. Thus, in this study we investigated the contribution of these IBD specific loci in our ethnically heterogeneous north Indian UC cohort in order to define its genetic architecture more conclusively.

Our study showed that SNPs from *IL23R*, *PTPN22* and *LOC730002/PTGER4* were largely monomorphic in our cohort. Though additional SNPs from in and around *PTPN22* and *LOC730002* did not show any association with UC, findings from *IL23R* locus (Table 2) warrant discussion. *IL23R* is considered as a genuine “generic” IBD susceptibility gene and has attained genome-wide significance with both UC [4,9,18–20] and CD [9,19,21–22] in various GWAS and independent replication studies. Interestingly, the non-synonymous SNP (rs11209026), the most widely replicated marker, with a potential protective role in Caucasians [9,19,23] and rs11465804 were almost monomorphic in both UC cases and controls. However, significant association ( $p < 0.05$ ) of additional SNPs selected from both within and around this gene (Table 2) is strongly suggestive of *IL23R* being a potential susceptibility gene and therapeutic target for UC in the north Indian population as well. However, the strength of association of this gene may vary in different populations. It may be mentioned here that resequencing of the complete *IL23R* exonic regions in 30 north Indian population based controls did not reveal any exonic SNPs in this gene. Thus, the suggestive association of SNPs around this gene (Table 2) may indicate the role of regulatory variants in *IL23R* in UC etiology in our cohort.

Alternatively, the associated SNP may be in linkage disequilibrium with another yet undetected causal variant. These results also demonstrate the importance of normative allelic data for populations under investigation while selecting SNPs for replication of association findings in them. Absence of *IL23R* SNPs (rs11465804 and rs11209026) has also been reported in Japanese, Korean and Chinese cohorts [7,24–26]. Such a fluctuation in allele frequencies across geographic regions could be attributed to different environmental conditions leading to apparent genetic/ allelic heterogeneity of disease between Asians and Caucasians.

An enticing highlight of this study is that we could replicate a few previously acknowledged UC specific SNPs in or near genes/ loci such as *RNF186*, *IL10*, *DLD*, and *NKX2-3* with *HLA-DRA* leading the list (Table 1). The anti-inflammatory cytokine *IL10* has long been proposed to limit intestinal inflammation, and genetically engineered *IL-10* deficient mice develop spontaneous colitis suggesting it might serve as a therapeutic target for UC [27]. *NKX2-3*, association of which has previously been shown with CD, is a transcription factor gene found to be associated with UC among Caucasians [6] seems to be a generic IBD gene in our sample also. Reassessment of such potential regions in both Caucasian and north Indian populations, who are ethnically related to Caucasian stock [28] may illuminate the common key pathogenic pathways underlying UC.

It has been reported that there exists an excess clustering of both CD and UC in families, which underscores the concept that the genetic architecture of these two disorders are overlapping. Of the 49 informative index SNPs tested in our UC cohort, 17 have been previously reported to be CD specific (Table 1). Of these, observed association of functionally relevant CD loci such as *JAK2*, *IL18RAP*, *LYRM4*, *TRIB1*, *TNFSF15*, *ZBP2* with *BTNL2* and *NOD2* at the forefront is noteworthy (Table 1). Recent investigation has shown an association between *BTNL2* gene and UC in population of European and Asian descent [29–30]. Both in our previous [16] and this study we observed association of *NOD2* with UC in the north Indian cohort suggesting the ethnic-specificity of this gene. Further, to investigate its possible contribution to CD, extensive resequencing in our CD cohort ( $N = 50$ ) was carried out. Similar to UC, absence of SNPs 8, 12 and 13 and occurrence of Pro268Ser indicated that allelic heterogeneity with regards to *NOD2* may be at play for CD as well. It has been reported that SNPs 8, 12 and 13 represent 82% of the *NOD2*-mutated chromosomes, [31] and that these polymorphisms account for about 18% of the genetic risk of CD in the Caucasian population [32]. Thus, our findings reiterate population specific genetic susceptibilities underlying complex disorders such as IBD which is a pathogen driven condition. These observations were corroborated by *ATG16LI* ( $p = 0.05$ ) (Table 1) further support that population specific disease susceptibility genes exist for IBD. Additionally, *FCGR2A-FCGR2C* region which reached genome-wide significance in both Japanese and Caucasian cohorts [6–7] was not significant in our population (Table 1). Similar findings have also been reported for *TNFSF-15* wherein the variants strongly associated with Caucasian UC cohort were not significant in Japanese UC samples [33].

To summarize, our replication attempt of meta-analysis findings clearly reveal (a) partial concordance of Caucasian based meta-analysis results; and (b) apparent genetic/ allelic heterogeneity at UC/CD loci. It is likely that some SNPs that did not pass correction may be associated with UC in north Indians but the study did not have sufficient power to detect these associations. In conclusion, the observed disparity in the allele frequency of GWAS hits in our cohort confirms differences in genetic architecture between populations. These results also suggest that

**Table 1.** Association status of 59 GWAS reported UC/CD specific susceptibility loci in a north Indian UC cohort.

| Meta-analysis Index SNPs <sup>a</sup> | Chr | Gene/Locus of interest | Previously identified phenotype in caucasians | P-value    | Allele | OR   |
|---------------------------------------|-----|------------------------|-----------------------------------------------|------------|--------|------|
| rs1317209                             | 1   | RNF186                 | UC                                            | 0.62       |        |      |
| rs3806308                             | 1   | RNF186                 | UC                                            | 0.008*     | A      | 0.80 |
| rs6426833                             | 1   | RNF186                 | UC                                            | 0.0004**   | G      | 0.74 |
| rs2201841                             | 1   | IL23R                  | UC                                            | 0.044*     | A      | 0.85 |
| rs11465804 <sup>b</sup>               | 1   | IL23R                  | CD                                            | -          |        |      |
| rs11209026 <sup>b</sup>               | 1   | IL23R                  | UC                                            | -          |        |      |
| rs2476601 <sup>b</sup>                | 1   | PTPN22                 | CD                                            | -          |        |      |
| rs2274910                             | 1   | ITLN1                  | CD                                            | 0.08       |        |      |
| rs10800309                            | 1   | FCGR2A                 | UC                                            | 0.40       |        |      |
| rs9286879                             | 1   | LOC441915              | CD                                            | 0.15       |        |      |
| rs3024505                             | 1   | IL10                   | UC                                            | 0.001**    | A      | 1.41 |
| rs11584383                            | 1   | KIF21B                 | CD                                            | 0.41       |        |      |
| rs780094                              | 2   | GCKR                   | CD                                            | 0.027*     | A      | 1.21 |
| rs6706689                             | 2   | PUS10                  | UC                                            | 0.33       |        |      |
| rs13003464                            | 2   | PUS10                  | IBD                                           | 0.68       |        |      |
| rs917997                              | 2   | IL18RAP                | CD                                            | 0.006*     | A      | 1.23 |
| rs3828309                             | 2   | ATG16L1                | CD                                            | 0.06       |        |      |
| rs3197999                             | 3   | MST1                   | IBD                                           | 0.027*     | A      | 1.21 |
| rs4957048                             | 5   | CEP72                  | UC                                            | 0.65       |        |      |
| rs4613763 <sup>b</sup>                | 5   | LOC730002              | CD                                            | -          |        |      |
| rs2188962                             | 5   | LOC441108              | CD                                            | 0.028*     | A      | 1.27 |
| rs10045431                            | 5   | IL12B                  | CD                                            | 0.33       |        |      |
| rs13361189 <sup>c</sup>               | 5   | IRGM                   | CD                                            | -          |        |      |
| rs12529198                            | 6   | LYRM4                  | CD                                            | 0.020*     | G      | 0.80 |
| rs6908425                             | 6   | CDKAL1                 | CD                                            | 0.90       |        |      |
| rs3763313                             | 6   | BTNL2                  | CD                                            | 0.00002**  | C      | 0.56 |
| rs2395185                             | 6   | HLA-DRA                | UC                                            | 0.000002** | A      | 0.63 |
| rs7758080                             | 6   | MAP3K7IP2              | CD                                            | 0.32       |        |      |
| rs2301436                             | 6   | FGFR1OP                | CD                                            | 0.047*     | A      | 1.17 |
| rs7746082                             | 6   | PRDM1                  | CD                                            | 0.019*     | A      | 1.24 |
| rs17309827 <sup>c</sup>               | 6   | SLC22A23               | CD                                            | -          |        |      |
| rs1456893                             | 7   | ZPBP                   | CD                                            | 0.12       |        |      |
| rs4598195                             | 7   | DLD                    | UC                                            | 0.005*     | C      | 0.78 |
| rs1551398                             | 8   | TRIB1                  | CD                                            | 0.004*     | A      | 1.24 |
| rs10758669                            | 9   | JAK2                   | CD                                            | 0.008*     | C      | 1.22 |
| rs4077515                             | 9   | CARD9                  | UC                                            | 0.16       |        |      |
| rs4263839                             | 9   | TNFSF15                | CD                                            | 0.019*     | A      | 0.81 |
| rs11190140                            | 10  | NKX2-3                 | IBD                                           | 0.006*     | A      | 1.23 |
| rs17582416                            | 10  | CUL2                   | CD                                            | 0.14       |        |      |
| rs10995271                            | 10  | ZNF365                 | CD                                            | 0.43       |        |      |
| rs7927894                             | 11  | C11orf29               | CD                                            | 0.09       |        |      |
| rs1558744                             | 12  | LOC341333              | UC                                            | 0.31       |        |      |
| rs971545                              | 12  | IL26                   | UC                                            | 0.73       |        |      |
| rs11175593 <sup>c</sup>               | 12  | LRRK2,MUC19            | CD                                            | -          |        |      |
| rs3764147                             | 13  | C13orf31               | CD                                            | 0.282      |        |      |
| rs2066843                             | 16  | NOD2                   | CD                                            | 0.0002**   | A      | 1.46 |
| rs2066844 <sup>c</sup>                | 16  | CARD15                 | CD                                            | -          |        |      |
| rs2066845 <sup>c</sup>                | 16  | CARD15                 | CD                                            | -          |        |      |

**Table 1.** Cont.

| Meta-analysis Index SNPs <sup>a</sup> | Chr | Gene/Locus of interest | Previously identified phenotype in caucasians | P-value | Allele | OR   |
|---------------------------------------|-----|------------------------|-----------------------------------------------|---------|--------|------|
| rs2066847 <sup>c</sup>                | 16  | CARD15                 | CD                                            | -       |        |      |
| rs2872507                             | 17  | ZPBP2                  | CD                                            | 0.009*  | A      | 1.22 |
| rs2305480                             | 17  | GSDML                  | UC                                            | 0.011*  | A      | 1.21 |
| rs744166                              | 17  | STAT3                  | CD                                            | 0.047*  | G      | 0.86 |
| rs991804                              | 17  | CCL2                   | CD                                            | 0.06    |        |      |
| rs8098673                             | 18  | LOC728473              | CD                                            | 0.038*  | C      | 0.85 |
| rs2542151                             | 18  | PTPN2                  | CD                                            | 0.041*  | G      | 1.21 |
| rs4807569                             | 19  | SBNO2                  | CD                                            | 0.53    |        |      |
| rs2836878                             | 21  | LOC391282              | UC                                            | 0.011*  | A      | 0.79 |
| rs762421                              | 21  | ICOSLG                 | CD                                            | 0.09    |        |      |
| rs1736135                             | 21  | LOC388814              | CD                                            | 0.85    |        |      |

<sup>a</sup>Mc Govern, et al., Genome-wide association identifies multiple ulcerative colitis susceptibility loci (2010) *Nat Genet.*; 42(4):332–7.

<sup>b</sup>Monomorphic.

<sup>c</sup>SNPs not in the Illumina Human600W-Quad used in this study.

\* $p < 0.05$ .

\*\*Significant after Bonferroni correction.

doi:10.1371/journal.pone.0016565.t001

resources such as HapMap need to be extended to cover diverse ethnic populations within the Indian subcontinent in order to enhance their utility for the conduct of association studies within these heterogeneous populations. Further, as the current study was limited to a selection of SNPs identified as susceptibility markers from the recent UC specific meta-analysis, a systematic GWAS in this terrain may not only be insightful for identifying population specific IBD risk conferring loci but also enable cross-ethnicity fine mapping of disease loci. Collectively, these data may help define the genetic relationship between CD and UC and thus unravel common, as well as disease-specific mechanisms of pathogenesis in diverse populations.

**Table 2.** List of significant ( $p < 0.05$ ) SNPs in and around IL23R gene.

| SNP        | Allele | P-value | OR (95% Confidence Intervals) |
|------------|--------|---------|-------------------------------|
| rs10889657 | G      | 0.005   | 0.79 (0.67–0.95)              |
| rs1884444  | C      | 0.01    | 0.83 (0.70–0.96)              |
| rs2064689  | A      | 0.01    | 0.81 (0.69–0.97)              |
| rs10489630 | C      | 0.02    | 0.83 (0.71–0.98)              |
| rs1004819  | G      | 0.04    | 0.86 (0.72–0.97)              |
| rs7517847  | C      | 0.004   | 0.79 (0.67–0.94)              |
| rs6682033  | G      | 0.01    | 0.76 (0.62–0.96)              |
| rs1343151  | A      | 0.01    | 0.77 (0.61–0.93)              |
| rs11209032 | G      | 0.02    | 0.84 (0.70–0.94)              |
| rs1495965  | A      | 0.03    | 0.85 (0.71–0.96)              |
| rs3790562  | G      | 0.02    | 0.69 (0.51–0.95)              |
| rs3790565  | G      | 0.01    | 0.76 (0.63–0.99)              |
| rs4297265  | G      | 0.04    | 0.86 (0.75–1.02)              |
| rs2270614  | A      | 0.04    | 0.86 (0.75–1.02)              |
| rs7555183  | A      | 0.02    | 0.84 (0.75–1.03)              |

doi:10.1371/journal.pone.0016565.t002

## Materials and Methods

### Ethics Statement

Ethical approval for this study was given by the respective institutional ethical committees (IEC, DMCH and IEC, UDSC) and informed written consent was acquired from the participants.

### UC and control subjects

A case-control study was carried out in subjects recruited from a tertiary hospital in Punjab, India. In brief, the diagnosis of UC was based on standard criteria that included clinical, endoscopic, radiologic and histopathological criteria. Patients with infectious colitis and indeterminate colitis were excluded. Controls were individuals recruited from the same study hospital and included blood donors and patients diagnosed with other ailments not related to IBD. Controls were selected such that they were ethnically similar to the cases and whose age range ( $\pm 10$  years) was within that of the cases.

### DNA extraction and Genotyping

DNA was collected from peripheral blood samples of UC patients and control samples using conventional phenol-chloroform method. For replicating meta-analysis based associations, 648 cases and 850 controls were genotyped using Infinium Human 660W-quad. Quality control steps were applied before the SNP genotypes were included in the final analysis. The average genotyping success rate was 99% and no marker deviated significantly ( $P < 0.0001$ ) from Hardy–Weinberg equilibrium in controls. In addition, SNPs with a minor allele frequency (MAF)  $< 0.05$  and missingness rate  $> 0.05$  were excluded. SNPs were tested for association with UC by Chi-square test implemented in PLINK [16] and Bonferroni correction was also applied.

### Resequencing

Exonic and exon-intron boundary regions of both *NOD2* and *IL23R* were amplified by PCR and sequenced on an ABI 3730

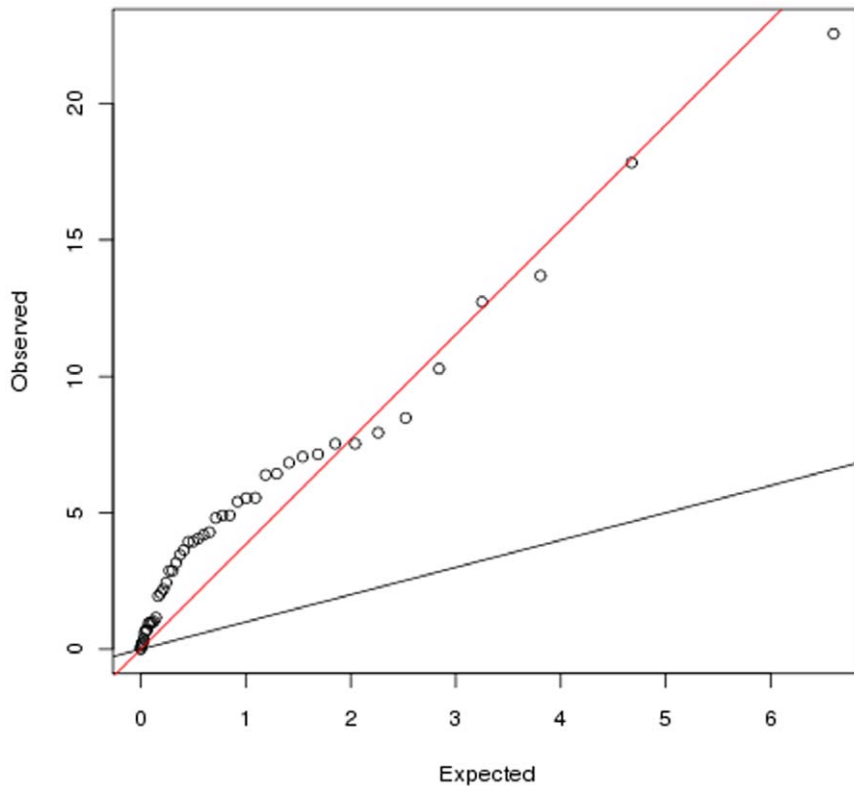

**Figure 1. Quantile-Quantile plot of chi-square test of association p-values of 49 SNPs.**  
doi:10.1371/journal.pone.0016565.g001

genetic analyzer. Details of primers used for amplification of all the exons are available on request.

### Acknowledgments

We thank Prof. Cisca Wijmenga, Dept. of Human Genetics, University of Groningen, The Netherlands for her critical inputs. We gratefully acknowledge the Central Instrumentation, Facility, University of Delhi South Campus, for the sequencing work.

### References

- Sood A, Midha V, Sood N, Bhatia AS, Avasthi G (2003) Incidence and prevalence of ulcerative colitis in Punjab, North India. *Gut* 52(11): 1587–90.
- Fisher SA, Tremelling M, Anderson CA, Gwilliam R, Bumpstead S, et al. (2008) Genetic determinants of ulcerative colitis include the ECM1 locus and five loci implicated in Crohn's disease. *Nat Genet* 40(6): 710–712.
- Franke A, Balschun T, Karlsen TH, Svendtoraitte J, Nikolaus S, et al. (2008) Sequence variants in IL10, ARPC2 and multiple other loci contribute to ulcerative colitis susceptibility. *Nat Genet* 40(11): 1319–23.
- Silverberg MS, Cho JH, Rioux JD, McGovern DP, Wu J, Anness V, et al. (2009) Ulcerative colitis-risk loci on chromosomes 1p36 and 12q15 found by genome-wide association study. *Nat Genet* 2009; 41(2): 216–20.
- Franke A, Balschun T, Sina C, Ellinghaus D, Häslér R, et al. (2010) Genome-wide association study for ulcerative colitis identifies risk loci at 7q22 and 22q13 (IL17REL). *Nat Genet* 2010; 42(4): 292–4.
- McGovern DP, Gardet A, Törkvi L, Goyette P, Essers J, et al. (2010) Genome-wide association identifies multiple ulcerative colitis susceptibility loci. *Nat Genet* 42(4): 332–7.
- Asano K, Matsuhita T, Umeno J, Hosono N, Takahashi A, et al. (2009) A genome-wide association study identifies three new susceptibility loci for ulcerative colitis in the Japanese population. *Nature Genetics* 41: 1325–329.
- Yamazaki K, McGovern T, Sina C, Ragoussis J, Paolucci M, Butler H, et al. (2005) Single nucleotide polymorphisms in TNFSF15 confer susceptibility to Crohn's disease. *Hum Mol Genet* 15; 14(22): 3499–506.
- Duerr RH, Taylor KD, Brant SR, Rioux JD, Silverberg MS, et al. (2006) A genome-wide association study identifies IL23R as an inflammatory bowel disease gene. *Science* 314(5804): 1461–3.
- Hampe J, Franke A, Rosenstiel P, Till A, Teuber M, et al. (2007) A genome-wide association scan of nonsynonymous SNPs identifies a susceptibility variant for Crohn disease in ATG16L1. *Nat Genet* 39(2): 207–11.
- Barrett JC, Hansoul S, Nicolae DL, Cho JH, Duerr RH, et al. (2008) Genome-wide association defines more than 30 distinct susceptibility loci for Crohn's disease. *Nat Genet* 40(8): 955–62.
- The Wellcome Trust Case Control Consortium (2007) Genome-wide association study of 14,000 cases of seven common diseases and 3,000 shared controls. *Nature* 447: 661–678.
- Franke A, Balschun T, Karlsen TH, Hedderich J, May S, et al. (2008) Replication of signals from recent studies of Crohn's disease identifies previously unknown disease loci for ulcerative colitis. *Nat Genet* 40(6): 713–5.
- Zhernakova A, van Diemen CC, Wijmenga C (2009) Detecting shared pathogenesis from the shared genetics of immune-related diseases. *Nat Rev Genet* 10(1): 43–55.
- Budarf ML, Labbe C, David G, Rioux JD (2009) GWA studies: rewriting the story of IBD. *Trends Genet* 25: 137–46.
- Juyal G, Amre D, Midha V, Sood A, Seidman E, et al. (2007) Evidence of allelic heterogeneity for associations between the NOD2/CARD15 gene and ulcerative colitis among North Indians. *Aliment Pharmacol Ther* 26(10): 1325–32.
- Purcell S, Neale B, Todd-Brown K, Thomas L, Ferreira MA, et al. (2007) PLINK: a tool set for whole-genome association and population-based linkage analyses. *Am J Hum Genet* 81(3): 559–75.
- Weersma RK, Zhernakova A, Nolte IM, Lefebvre C, Rioux JD, et al. (2008) ATG16L1 and IL23R are associated with inflammatory bowel diseases but not with celiac disease in the Netherlands. *Am J Gastroenterol* 103(3): 621–7.

### Author Contributions

Conceived and designed the experiments: TBK RCJ AS VM DA GJ. Performed the experiments: GJ PP. Analyzed the data: GJ PP SS. Contributed reagents/materials/analysis tools: TBK VM AS. Wrote the paper: GJ. Candidate gene associations and resequencing: GJ MS. Editing: GJ PP SS VM AS DA RCJ TBK.

19. Tremelling M, Cummings F, Fisher SA, Mansfield J, Gwilliam R, et al. (2007) IL23R variation determines susceptibility but not disease phenotype in inflammatory bowel disease. *Gastroenterology* 132(5): 1657–64.
20. UK IBD Genetics Consortium, Barrett JC, Lee JC, Lees CW, Prescott NJ, et al. (2009) Genome-wide association study of ulcerative colitis identifies three new susceptibility loci, including the HNF4A region. *Nat Genet* 41(12): 1330–4.
21. Raelson JV, Little RD, Ruether A, Fournier H, Paquin B, et al. (2007) Genome-wide association study for Crohn's disease in the Quebec Founder Population identifies multiple validated disease loci. *Proc Natl Acad Sci* 104(37): 14747–52.
22. Roberts RL, Geary RB, Hollis-Moffatt JE, Miller AL, Reid J, et al. (2007) IL23R R381Q and ATG16L1 T300A are strongly associated with Crohn's disease in a study of New Zealand Caucasians with inflammatory bowel disease. *Am J Gastroenterol* 102(12): 2754–61.
23. Büning C, Schmidt HH, Molnar T, De Jong DJ, Fiedler T, et al. (2007) Heterozygosity for IL23R p.Arg381Gln confers a protective effect not only against Crohn's disease but also ulcerative colitis. *Aliment Pharmacol Ther* 26(7): 1025–33.
24. Yang SK, Park M, Lim J, Park SH, Ye BD, et al. (2009) Contribution of IL23R but not ATG16L1 to Crohn's disease susceptibility in Koreans. *Inflamm Bowel Dis* 15(9): 1385–90.
25. Yamazaki K, Onouchi Y, Takazoe M, Kubo M, Nakamura Y, et al. (2007) Association analysis of genetic variants in IL23R, ATG16L1 and 5p13.1 loci with Crohn's disease in Japanese patients. *J Hum Genet* 52(7): 575–83.
26. Bin C, Zhirong Z, Xiaolin W, Minhu C, Mei L, et al. (2009) Contribution of rs11465788 in IL23R gene to Crohn's disease susceptibility and phenotype in Chinese population. *J Genet* 88(2): 191–6.
27. Madsen KL, Doyle JS, Tavernini MM, Jewell LD, Rennie RP, et al. (2000) Antibiotic therapy attenuates colitis in interleukin 10 gene-deficient mice. *Gastroenterology* 118: 1094–1105.
28. Rajkumar R, Kashyap VK (2004) Genetic structure of four socio-culturally diversified caste populations of southwest India and their affinity with related Indian and global groups. *BMC Genetics* 5: 23.
29. Mochida A, Kinouchi Y, Negoro K, Takahashi S, Takagi S, et al. (2007) Butyrophilin-like 2 gene is associated with ulcerative colitis in the Japanese under strong linkage disequilibrium with HLA-DRB1\*1502. *Tissue Antigens* 70: 128–35.
30. Fisher SA, Tremelling M, Anderson CA, Gwilliam R, Bumpstead S, et al. (2008) Genetic determinants of ulcerative colitis include the ECM1 locus and five loci implicated in Crohn's disease. *Nat Genet* 40: 710–2.
31. Hugot JP, Zaccaria I, Cavanaugh J, Yang H, Vermeire S, et al. (2007) Prevalence of CARD15 /NOD2 mutations in Caucasian healthy people. *Am J Gastroenterol* 102: 1259–67.
32. Mathew CG, Lewis CM (2004) Genetics of inflammatory bowel disease: progress and prospects. *Hum Mol Genet* 13: 161–8.
33. Kakuta Y, Kinouchi Y, Negoro K, Takahashi S, Shimosegawa T (2006) Association study of TNFSF15 polymorphisms in Japanese patients with inflammatory bowel disease. *Gut* 55(10): 1527–8.
